# Supplementary material for: Association Between Measurable Residual Disease in Patients With Intermediate-Risk Acute Myeloid Leukemia and First Remission, Treatment, and Outcomes
Source: PubMed Central journal article supplement (PMC8264648; doi:10.1001/jamanetworkopen.2021.15991), 2021-07-07
Supplement: jamanetwopen-e2115991-s001.pdf [file jamanetwopen-e2115991-s001.pdf]

## Supplementary Online Content

Yu S, Fan Z, Ma L, et al. Association between measurable residual disease in patients with intermediate-risk acute myeloid leukemia and first remission, treatment, and outcomes.

*JAMA Netw Open.* 2021;4(7):e2115991. doi:10.1001/jamanetworkopen.2021.15991

**eTable.** Causes of Death Posttransplantation

**eFigure.** Forest Plots for Survival of MSD-SCT and AD-SCT

This supplementary material has been provided by the authors to give readers additional information about their work.

**eTable. Causes of Death Posttransplantation**

| Cause of death    | CMT group | auto-SCT group | allo-SCT group |
|-------------------|-----------|----------------|----------------|
|                   | no. (%)   | no. (%)        | no. (%)        |
| Relapse           | 58(89.2)  | 24(82.8)       | 28 (45.9)      |
| GVHD-related      |           |                |                |
| aGVHD             | 1(1.5)*   | 0(0)           | 8(13.1)        |
| cGVHD             | 0(0)      | 0(0)           | 5(8.2)         |
| Treatment-related |           |                |                |
| Infections        | 5 (7.7)   | 5 (17.2)       | 13 (21.3)      |
| others            | 1(1.5)    | 0(0)           | 7(11.5)        |

Abbreviations: CMT, chemotherapy; auto-SCT, autologous stem cell transplantation; allo-SCT, allogeneic stem cell transplantation.

\*Some patients received allo-SCT as salvage treatment in CMT group and one died of aGVHD

**eFigure.** Forest Plots for Survival of MSD-SCT and AD-SCT. (a) LFS. (b) OS. (c) GRFS

**a**

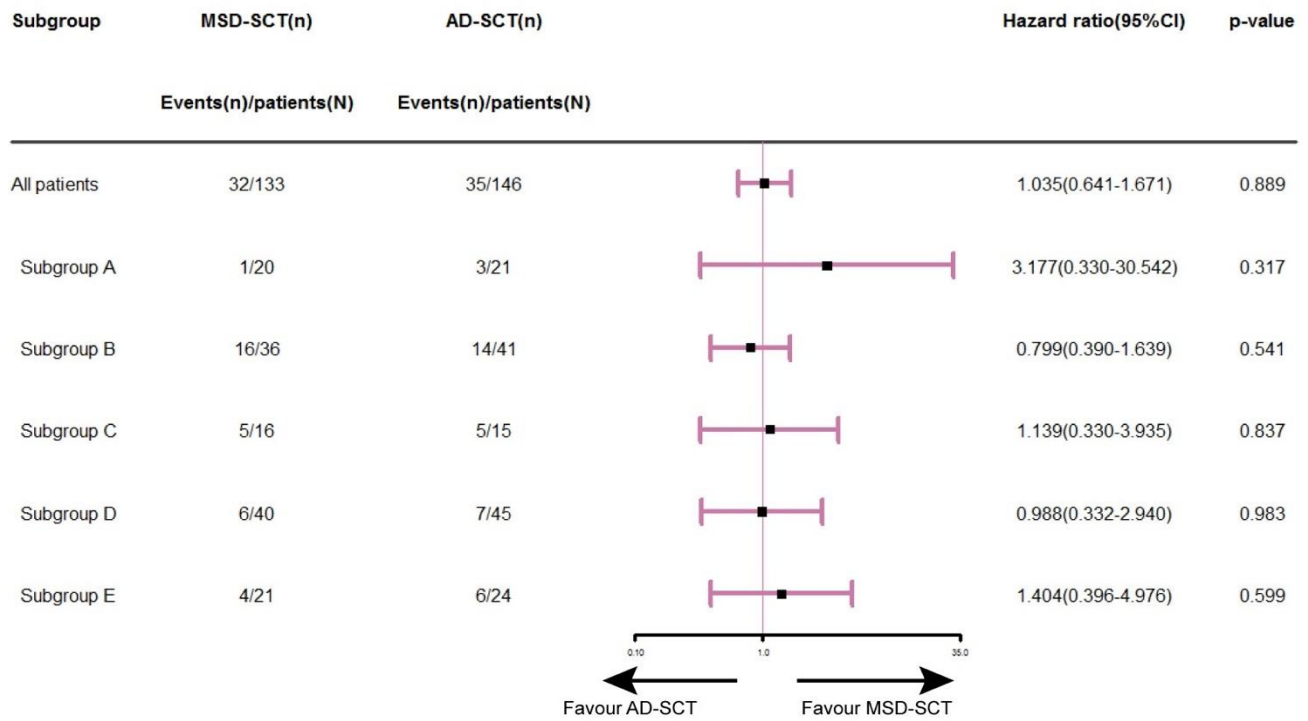

**b**

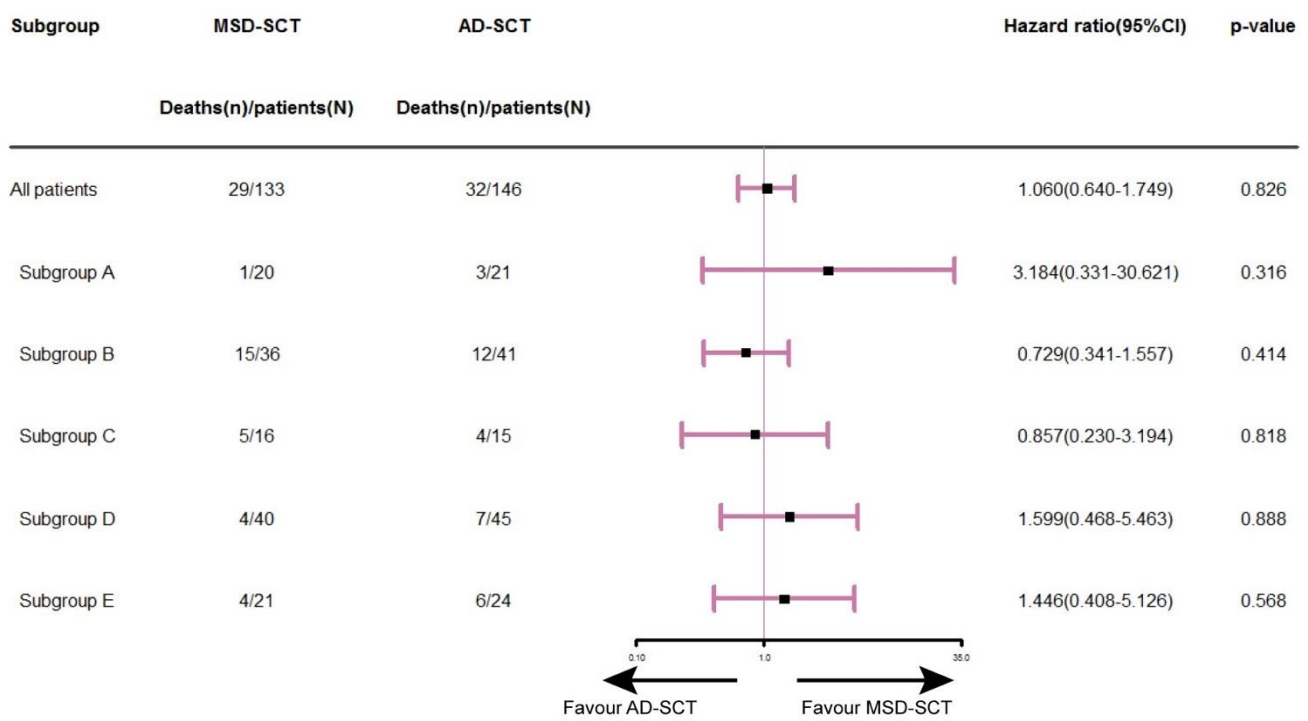

**c**

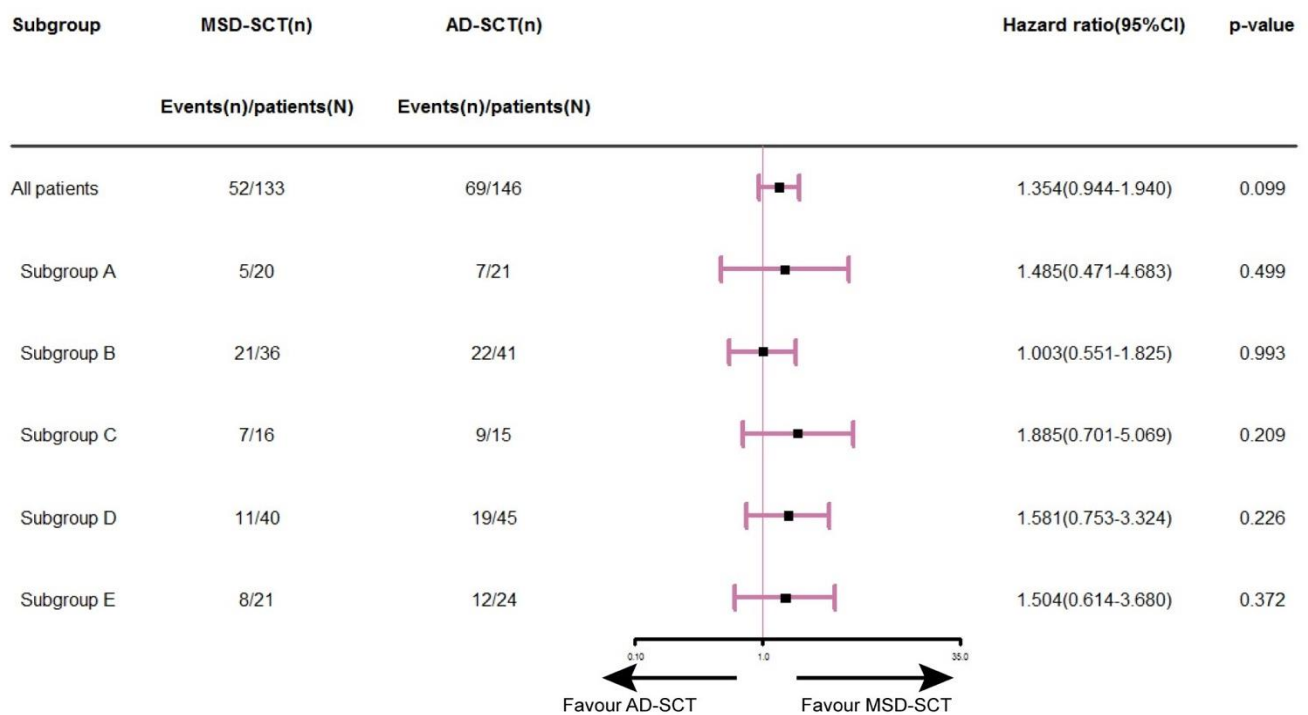

Abbreviations: MSD-SCT, matched sibling donor stem cell transplant; AD-SCT, alternative donor stem cell transplant.

Subgroup A, patients who become MRD negative after one course of chemotherapy and had persistently negative MRD; subgroup B, persistently positive MRD; subgroup C, recurrent MRD+ patients after being MRD-; subgroup D, patients who become MRD negative after two courses of chemotherapy; subgroup E, patients who become MRD negative after three courses of chemotherapy.
